# Supplementary material for: Membrane-bound Ubx2 recruits Cdc48 to ubiquitin ligases and their substrates to ensure efficient ER-associated protein degradation
Source: Springer Nature journal article supplement (doi:10.1038/ncb1299), 2005-09-18
Supplement: ncb1299-s1.pdf [file ncb1299-s1.pdf]

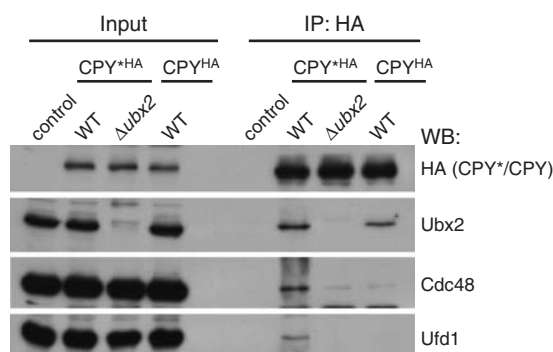**Supplementary Figure S1: Ubx2 recruits Cdc48 and Ufd1 to immature CPY\*, but not wildtype CPY.**

Lysates of wildtype and  $\Delta$ Ubx2 cells expressing 3HA-epitope tagged mutant CPY\* and wildtype CPY as indicated were subjected to immunoprecipitation (IP) with anti-HA antibody, followed by immunoblotting (WB) using the indicated antibodies. The wildtype strain not expressing 3HA-epitope tagged CPY served as negative control.

Ubx2 interacts not only with the ERAD substrate CPY\*<sup>HA</sup>, but also with wildtype CPY<sup>HA</sup>, albeit with reduced efficiency. The predominant species of CPY\*<sup>HA</sup> immunoprecipitated by the HA antibody and detected in the HA blot is the ER-localized P1 precursor form. From the very similar running behaviour of wildtype CPY<sup>HA</sup>, we conclude that it is also the P1 form of CPY<sup>HA</sup>, which is recognized by Ubx2. No mature form of wildtype CPY<sup>HA</sup> was detectable in the input or in the immunoprecipitate. Apparently, the slightly overexpressed, 3HA-epitope tagged form of wildtype CPY accumulates in its P1 precursor form, perhaps because of delayed maturation. Alternatively, the epitope tag of mature wildtype CPY<sup>HA</sup> may be rapidly removed by vacuolar proteases. In conclusion, Ubx2 interacts with an immature precursor form of wildtype CPY<sup>HA</sup>, most likely the P1 form. Importantly, and in contrast to the ERAD substrate CPY\*, Ubx2 does not recruit Cdc48 and Ufd1 to wildtype CPY<sup>HA</sup>.

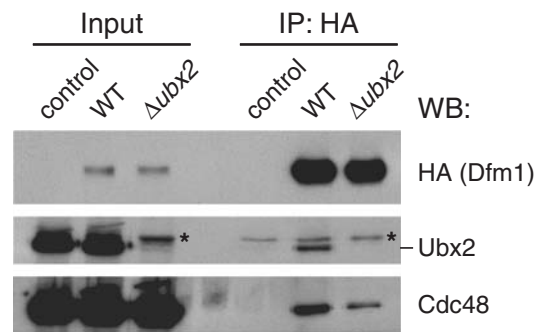

**Supplementary Figure S2: Ubx2 recruits Cdc48 to the putative dislocation pore protein Dfm1.**

Lysates of wildtype and  $\Delta ubx2$  cells expressing 3HA-epitope tagged Dfm1 were subjected to immunoprecipitation (IP) with anti-HA antibody, followed by immunoblotting (WB) using the indicated antibodies. The untagged wildtype strain served as negative control. A cross-reacting band that is occasionally detected by the anti-Ubx2 antibody is marked by asterisks; the Ubx2 band is indicated by a thin line.
